# Supplementary material for: mTORC1 regulates cell survival under glucose starvation through 4EBP1/2-mediated translational reprogramming of fatty acid metabolism
Source: PubMed Central journal article supplement (PMC11094136; doi:10.1038/s41467-024-48386-y), 2024-05-14
Supplement: 41467_2024_48386_MOESM1_ESM.pdf [file 41467_2024_48386_MOESM1_ESM.pdf]

**A**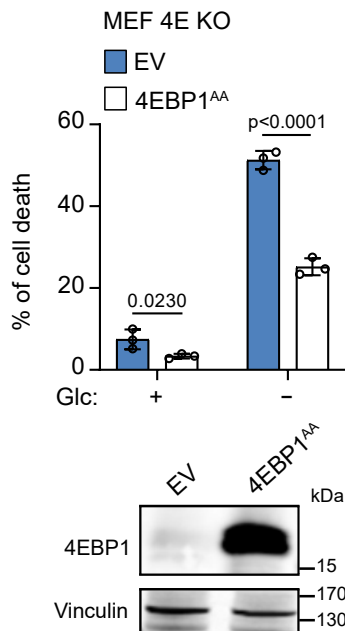**B**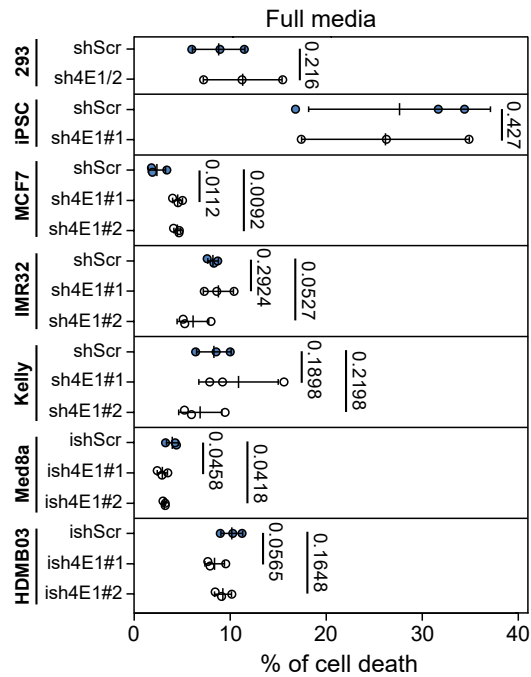**C**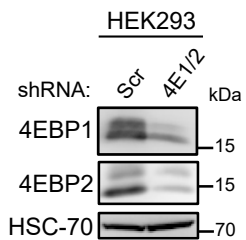**D**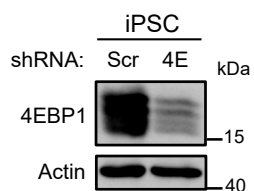**E**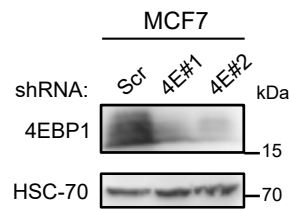**F**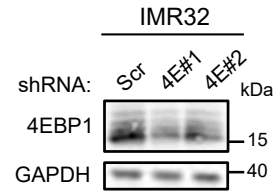**G**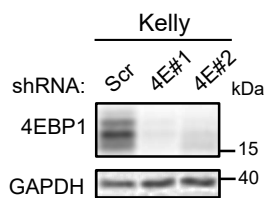**H**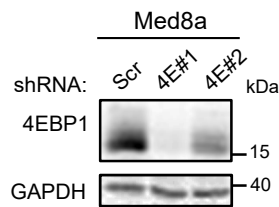**I**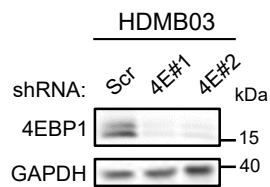**J**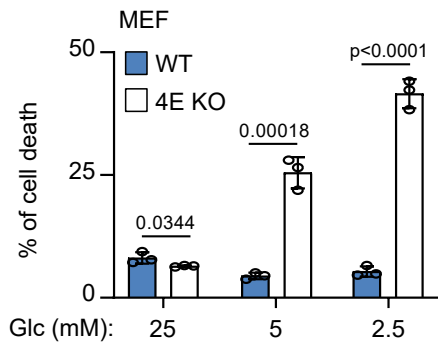**K**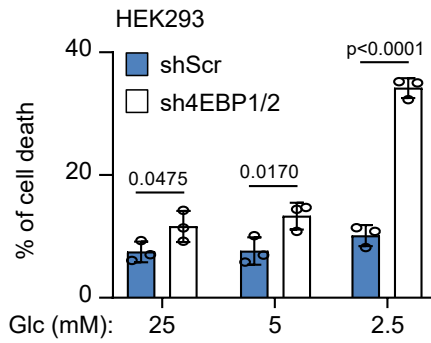**L**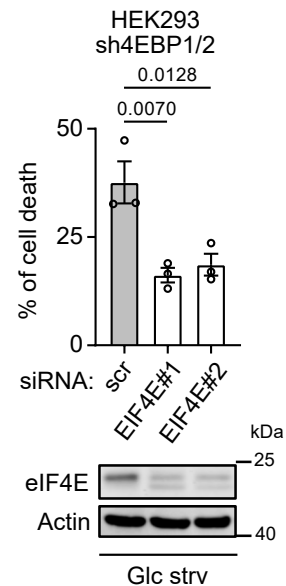

**Supplementary Figure 1. The mTORC1 substrates 4EBP1/2 support cell survival under glucose starvation**

(A) Control (EV) and stable 4EBP1<sup>AA</sup> overexpressing 4E KO MEFs were grown in complete media or starved for glucose (Glc) for 48 hrs. Cell death was measured by PI staining and flow cytometry. The level of the indicated proteins was analyzed by immunoblotting. (B) Control (shScr) and stable 4EBP1 and 4EBP2 knock down (sh4EBP1/2) HEK293 cells, or shScr and stable 4EBP1 knock down (sh4EBP1) iPSC, MCF7, IMR-32, and Kelly, or inducible control (ishScr) and stable 4EBP1 knock down (ish4EBP1) Med8a and HD-MB03 cells were grown in complete media. Med8a and HD-MB03 cells were treated with 1  $\mu$ g/ml doxycycline for 72 hrs. Cell death was measured as in (A). (C-I) Cells from (B) were analyzed by immunoblotting for the levels of the indicated proteins. Representative immunoblots of two independent experiments are shown. (J) WT and 4E KO MEFs were grown in complete medium or medium containing the indicated concentrations of glucose for 48 hrs. Cell death was measured as in (A). (K) ShScr and sh4EBP1/2 HEK293 cells were grown in complete medium or medium containing the indicated concentrations of glucose for 48 hrs. Cell death was measured as in (A). (L) ShScr and sh4EBP1/2 HEK293 cells were transfected with control siRNA (scr) or siRNAs targeting *EIF4E* and grown in glucose starved medium (Glc strv) for 48 hrs. Cell death was analyzed as in (A) and the level of the indicated proteins was analyzed by immunoblotting. Data are shown as the mean  $\pm$  SD. Statistics: unpaired one-sided (A, J, K, L) or two-sided (B) Student's *t* test (b); n=3 independent experiments for A, B, J, K, L. Source data are provided as a Source Data file.

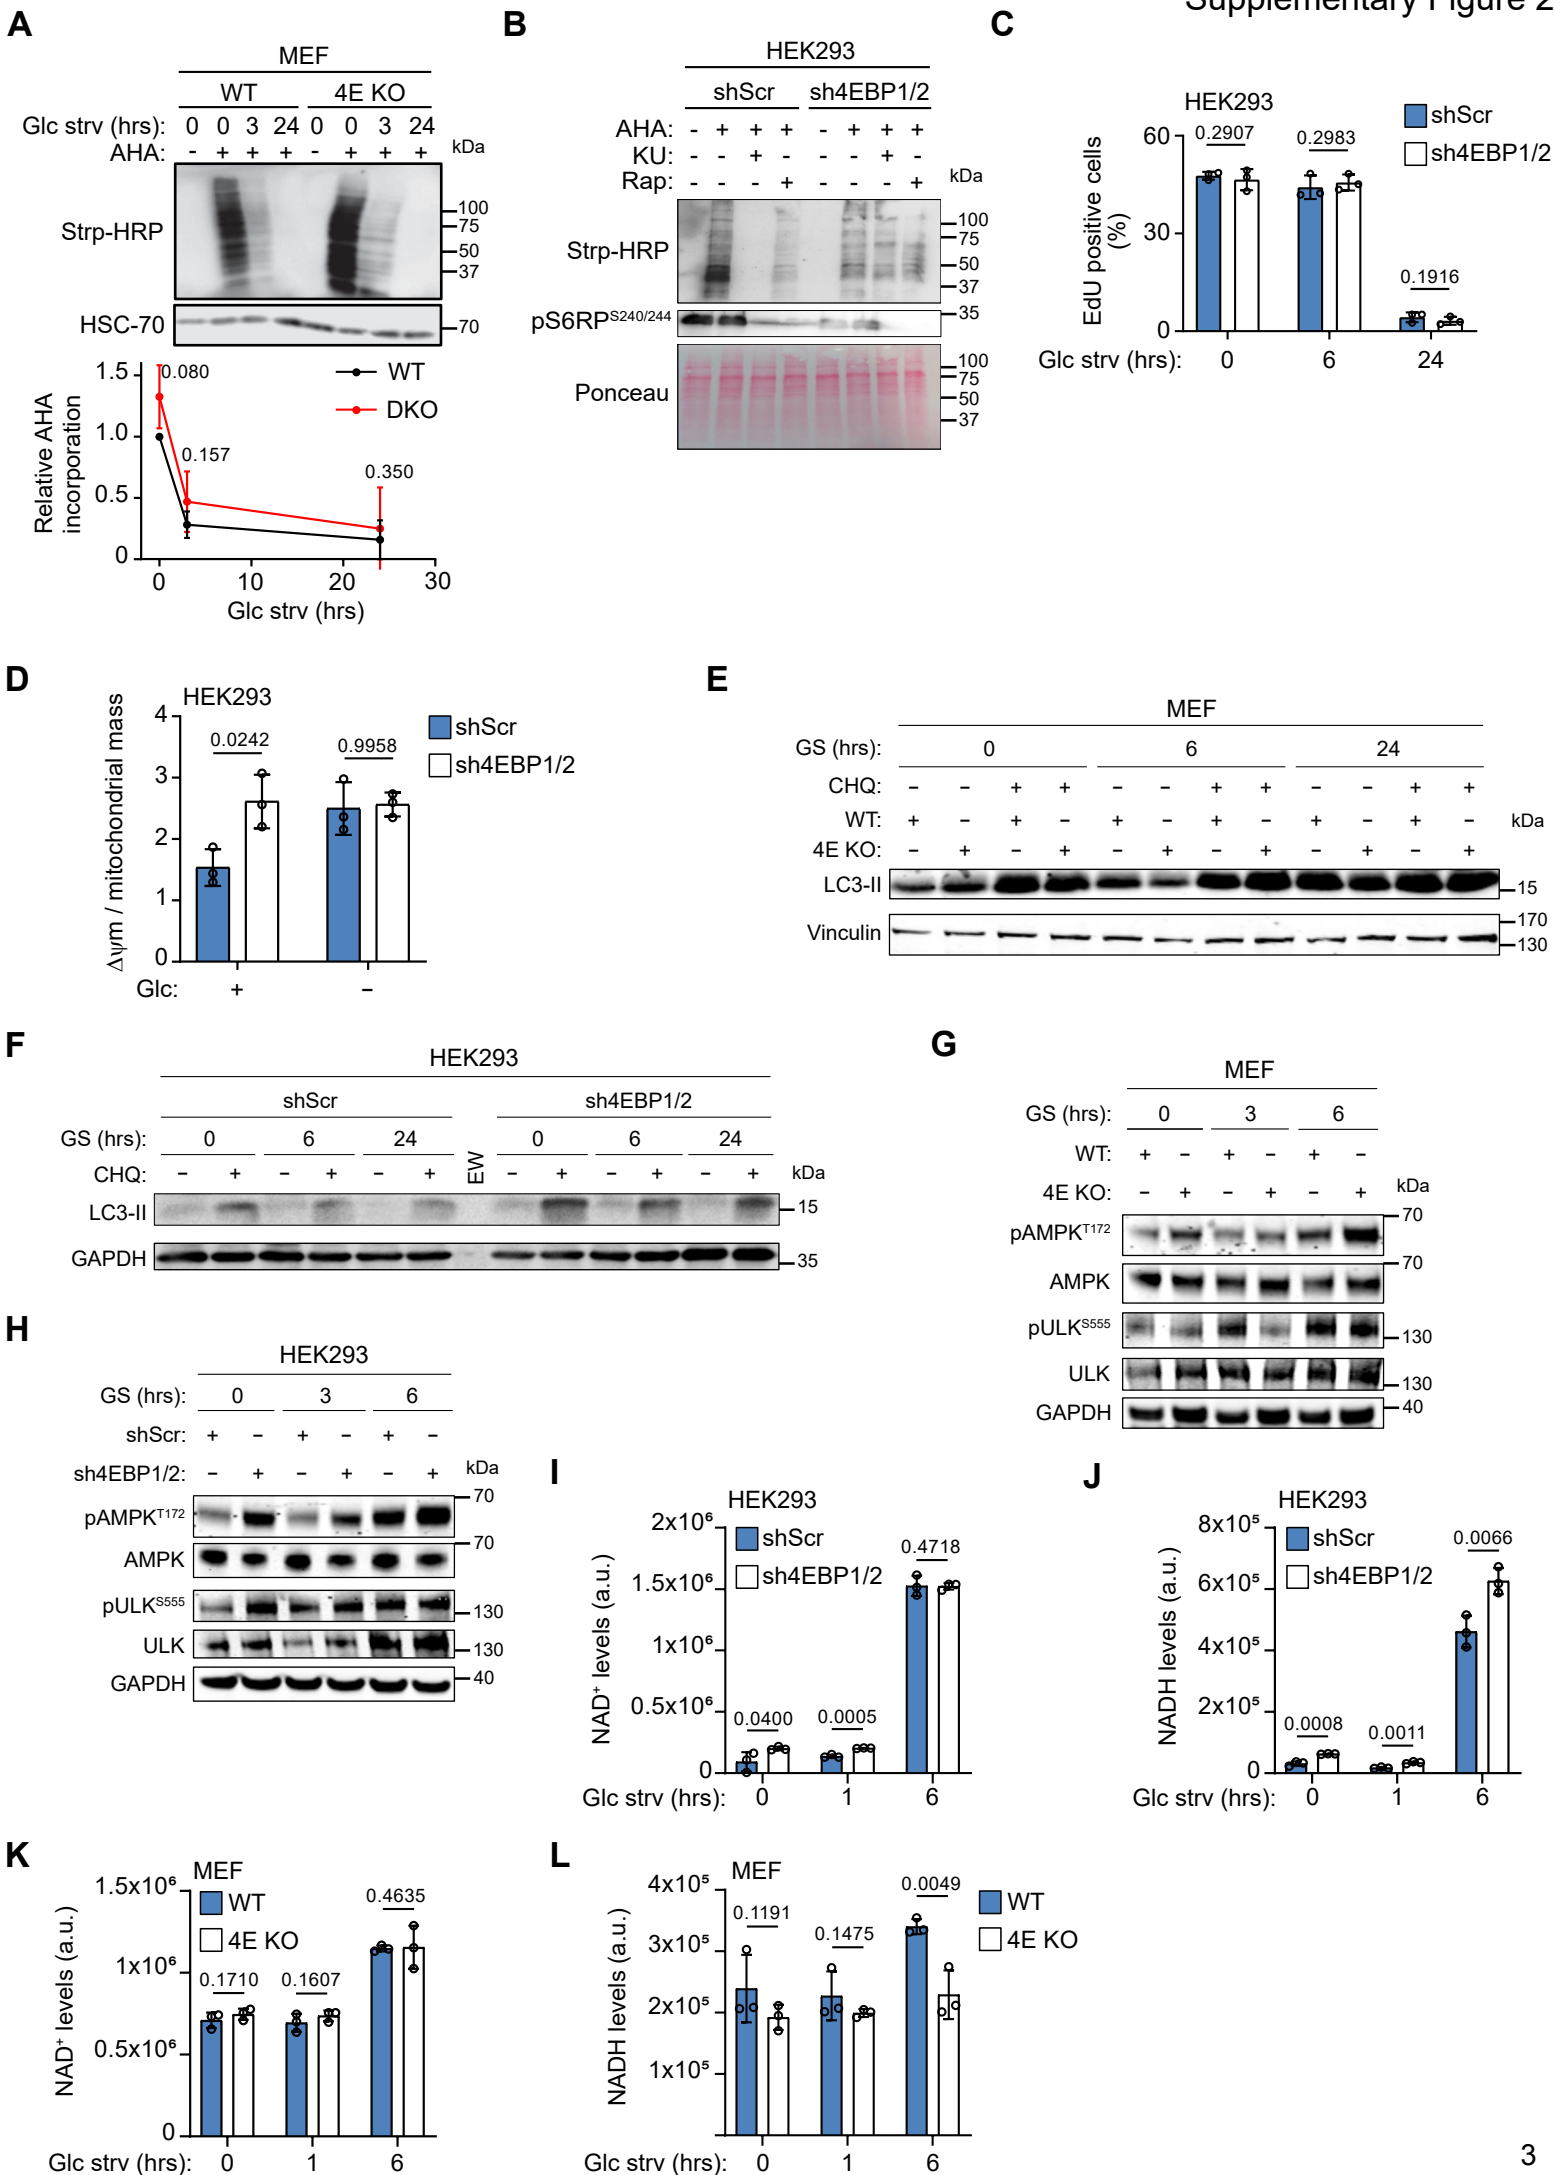

**Supplementary Figure 2. 4EBP1/2 do not control overall protein synthesis, proliferation, mitochondrial activity or autophagy under glucose starvation**

(A) The indicated cells were grown in complete medium or glucose starved (Glc strv) for the indicated times and labeled with azidohomoalanine (AHA). Levels of AHA-labelled proteins were detected by immunoblotting. (B) The indicated cells were grown in complete media, treated or not with rapamycin (Rapa) or KU-0063794 (KU), and labeled with azidohomoalanine (AHA). Levels of AHA-labelled proteins were detected by immunoblotting with a streptavidin conjugate. Representative immunoblots of three independent experiments are shown for A, B. (C) The indicated cells were grown in complete medium or glucose starved (Glc strv) for the indicated times and labeled with EdU. The percentage of EdU-positive cells was analyzed by flow cytometry. (D) The indicated cells were grown in complete medium or glucose (Glc) starved for 24 hrs. Mitochondrial membrane potential ( $\Delta\psi_m$ ) was measured with TMRE staining and mitochondrial mass with MitoTracker™ Green FM and analyzed by flow cytometry. (E, F) The indicated cells were grown in complete medium or glucose starved (GS) for the indicated times with or without chloroquine (CHQ). Cell lysates were analyzed by immunoblotting using antibodies against the indicated proteins. Representative immunoblots of three independent experiments are shown. (G, H) The indicated cells were grown in complete medium or glucose starved (GS) for the indicated times. Cell lysates were analyzed by immunoblotting using antibodies against the indicated proteins. Representative immunoblots of three independent experiments are shown. (I-L) The indicated cells were grown in complete medium or glucose starved (glc strv) for the indicated times and NAD<sup>+</sup> or NADH levels were measured. Data are shown as the mean  $\pm$  SD. Statistics: unpaired one-sided (C, D) or two-sided (I, J, K, L) Student's *t* test; n=3 independent experiments for A, B, C, D, I, J, K, L. Source data are provided as a Source Data file.

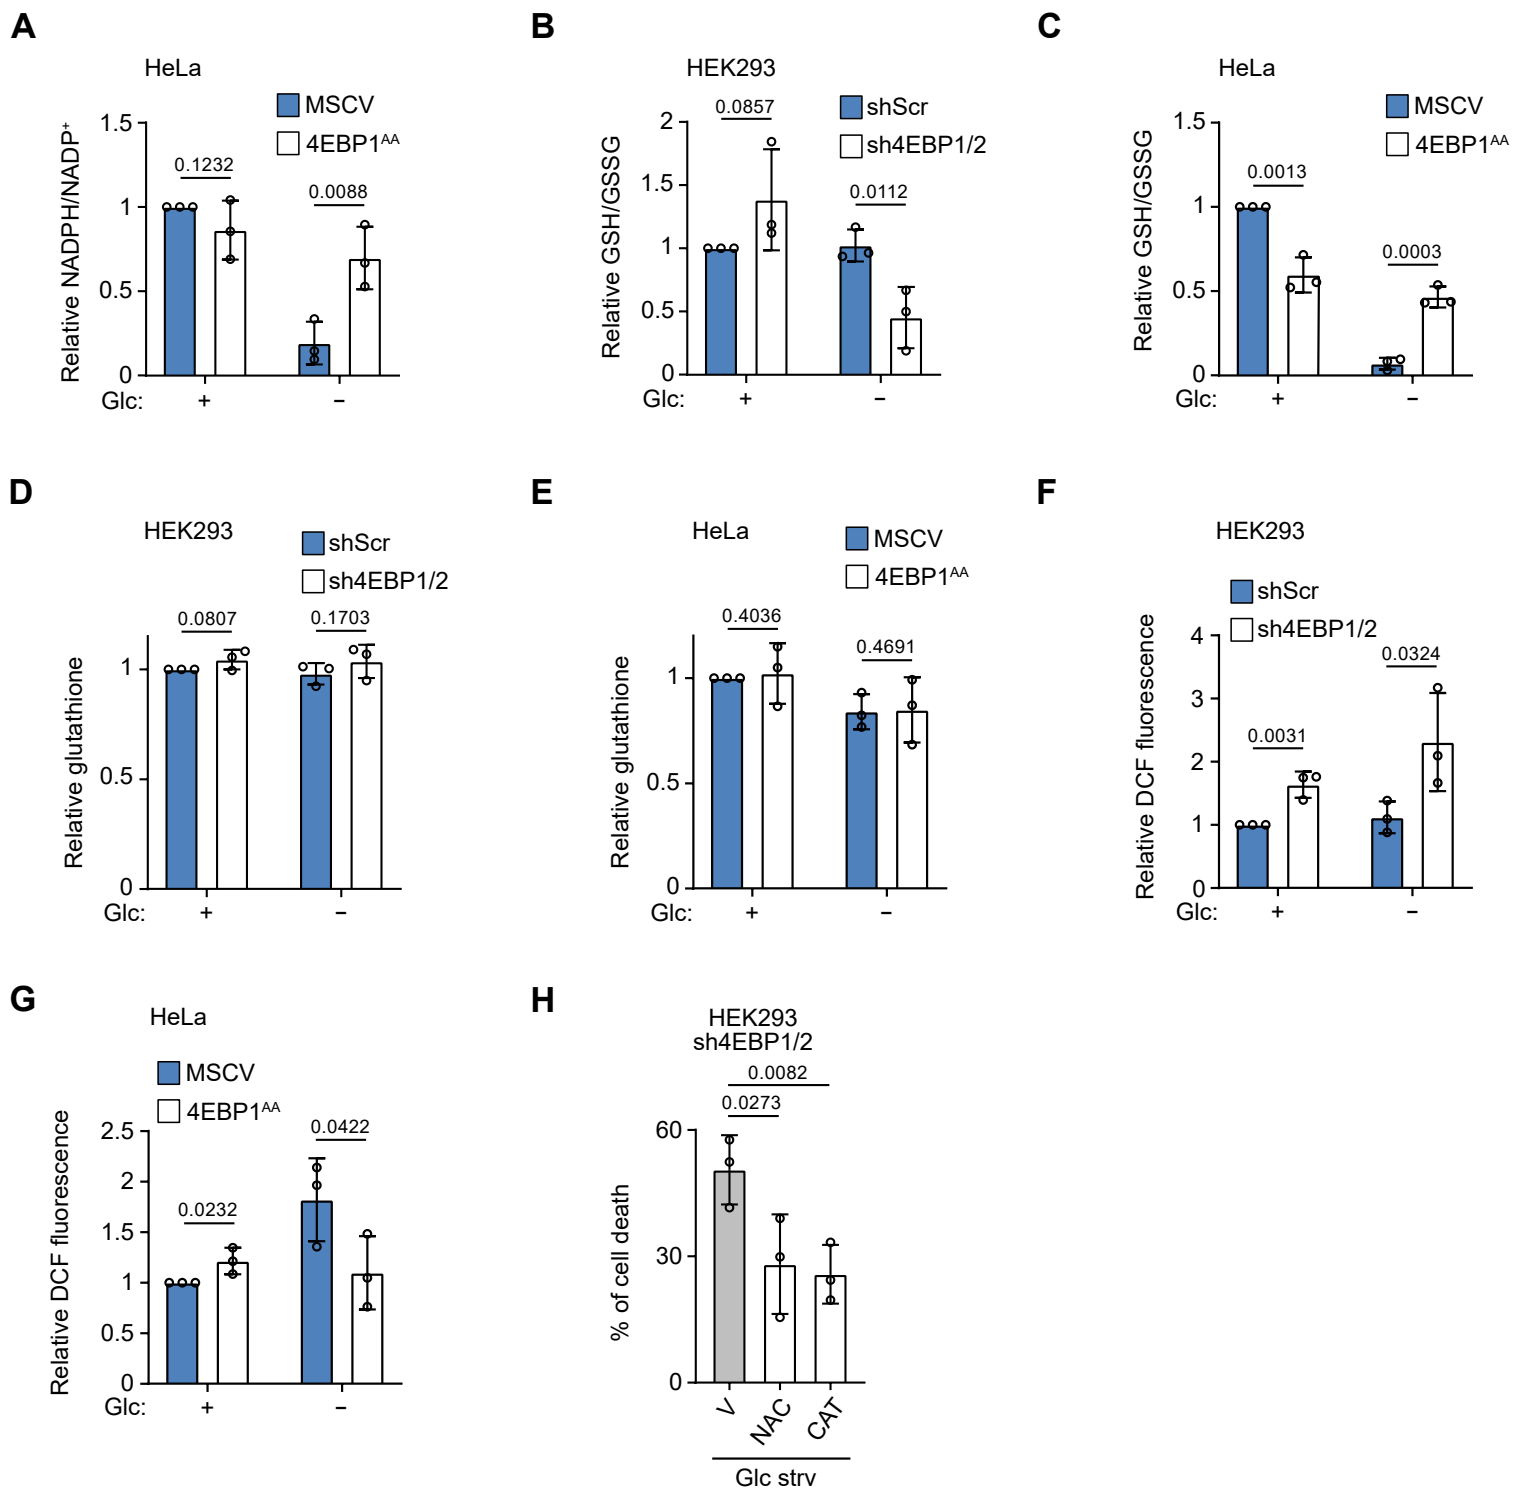

### Supplementary Figure 3. 4EBP1/2 regulate intracellular redox balance under glucose starvation

(A) MSCV and stable 4EBP1<sup>AA</sup> overexpressing HeLa cells were grown in complete medium or glucose (Glc) starved for 24 hrs, and NADP<sup>+</sup> and NADPH levels were measured. (B, C) Control (shScr) and sh4EBP1/2 HEK293 (B), or MSCV and stable 4EBP1<sup>AA</sup> overexpressing HeLa cells (C) were grown in complete medium or glucose (Glc) starved for 24 hrs, and reduced and total glutathione were measured and expressed as the ratio of reduced (GSH) to oxidized (GSSG) glutathione. (D, E) ShScr and sh4EBP1/2 HEK293 cells (D), or MSCV or 4EBP1<sup>AA</sup> overexpressing HeLa cells (E) were grown in complete medium or glucose (Glc) starved for 24 hrs, and total glutathione was measured. (F, G) ShScr and sh4EBP1/2 HEK293 (F), or MSCV and stable 4EBP1<sup>AA</sup> overexpressing HeLa cells (G) grown in complete medium or glucose (Glc) starved for 24 hrs were labelled with CM-DCFDA and analyzed by flow cytometry. (H) Sh4EBP1/2 HEK293 cells were grown in glucose starved medium (Glc strv) and treated with vehicle (V), N-acetyl cysteine (NAC) or Catalase (CAT) for 48 hrs. Cell death was measured by PI staining and flow cytometry. Data are shown as the mean  $\pm$  SD. Statistics: unpaired one-sided Student's *t* test (A, B, C, D, E, F, G, H); n=3 independent experiments for A, B, C, D, E, F, G, H. Source data are provided as a Source Data file.

A

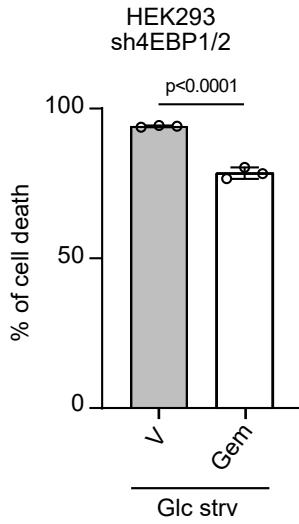

B

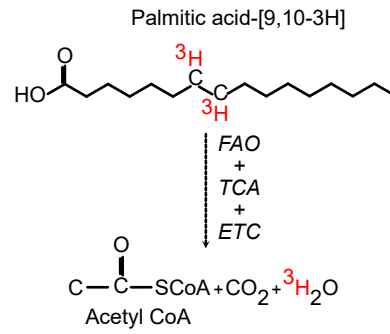

C

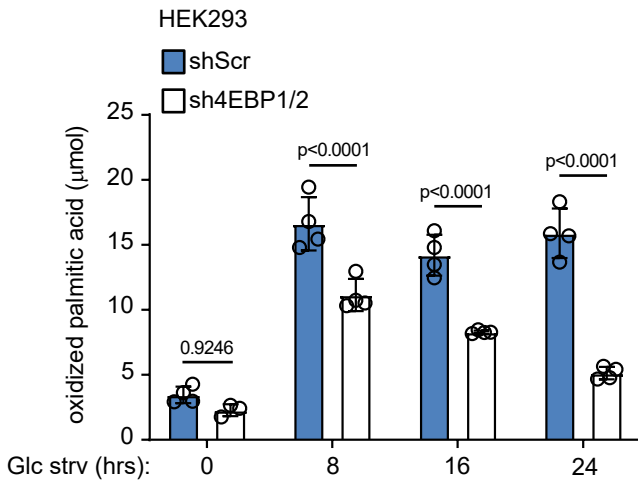

D

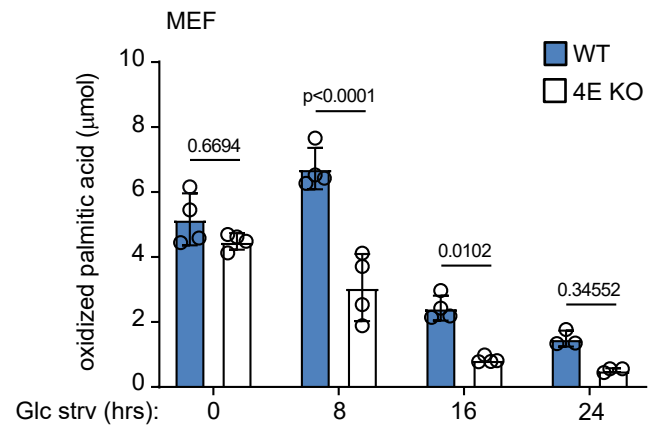

#### Supplementary Figure 4. 4EBP1/2 promote fatty acid oxidation under glucose deprivation

(A) Sh4EBP1/2 HEK293 cells were grown in glucose starved medium (Glc strv) with vehicle (V) or with gemcitabine (Gem) for 48 hrs. Cell death was measured by PI staining and flow cytometry.  $n=3$  independent experiments. (B) Scheme of the [<sup>3</sup>H] palmitate labeling assay to measure fatty acid oxidation activity. FAO: fatty acid oxidation, TCA: tricarboxylic acid cycle, ETC: electron transport chain. (C, D) Control (shScr) and sh4EBP1/2 HEK293 cells (C), or WT and 4EBP1/4EBP2 DKO (4E KO) MEF (D), grown in complete medium or glucose (Glc) starved for 24 hrs were labeled with [<sup>3</sup>H] palmitate in the last 6 hrs. [<sup>3</sup>H] was measured in conditioned media using a scintillation counter and normalized to total protein levels and by the percentage of [<sup>3</sup>H] collected.  $n=3-4$  independent experiments. Data are shown as the mean  $\pm$  SD. Statistics: unpaired one-sided Student's *t* test (A), two way ANOVA (C, D). Source data are provided as a Source Data file.

**A**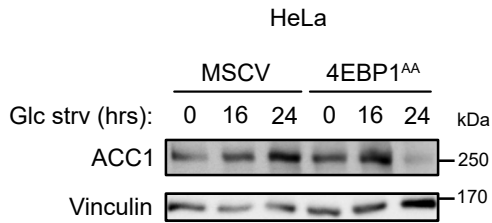**B**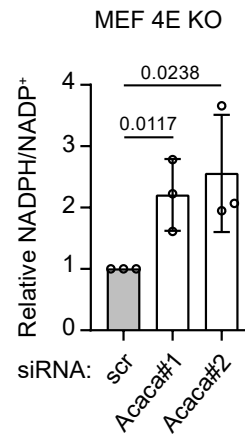**C**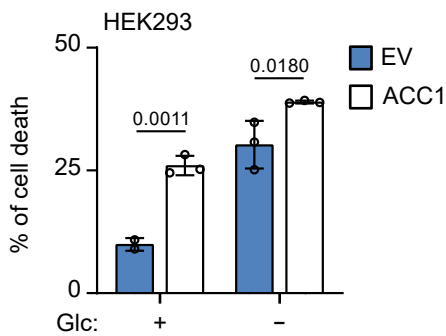**D**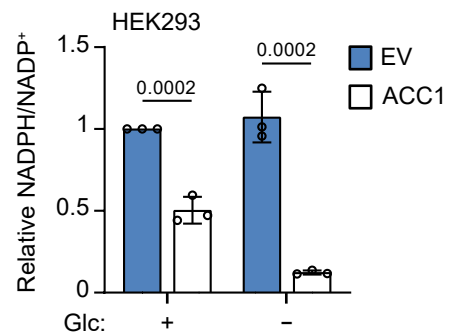

### Supplementary Figure 5. The 4EBP1-ACC1 axis regulates cell survival and NADPH levels under glucose starvation

(A) MSCV or 4EBP1<sup>AA</sup> overexpressing HeLa cells were grown in complete medium or glucose starved (Glc strv) for the indicated times and analyzed by immunoblotting using antibodies against ACC1 and Vinculin as reference. Representative immunoblots of three independent experiments are shown. (B) 4E KO MEF were transfected with control siRNA (scr) or siRNAs targeting *Acaca*, grown in glucose starved medium (Glc strv) for 48 hrs and NADP<sup>+</sup> and NADPH levels were measured. (C) HEK293 cells transfected with empty vector (EV) or with an ACC1 overexpressing vector were grown in complete medium or glucose (Glc) starved for 48 hrs. Cell death was measured by PI staining and flow cytometry. (D) HEK293 cells transfected with empty vector (EV) or with an ACC1 overexpressing vector were grown in complete medium or glucose (Glc) starved for 24 hrs and NADP<sup>+</sup> and NADPH levels were measured. Data are shown as the mean  $\pm$  SD. Statistics: unpaired one-sided Student's *t* test (B, C, D); n=3 independent experiments for B, C, D. Source data are provided as a Source Data file.

**A**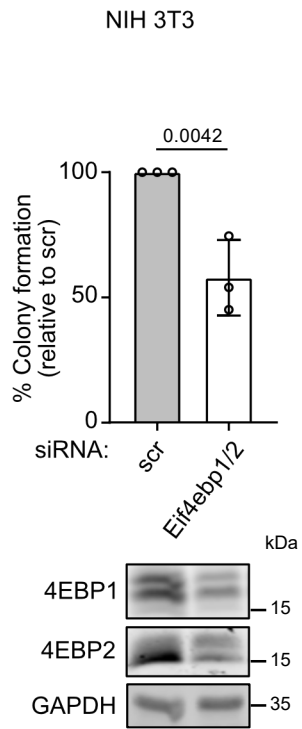**B**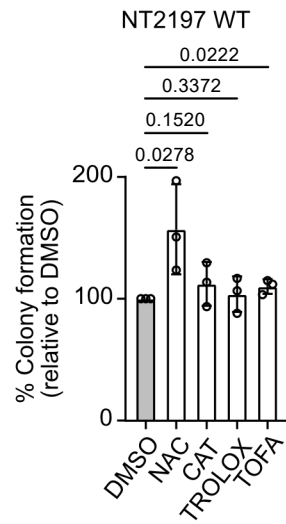**C**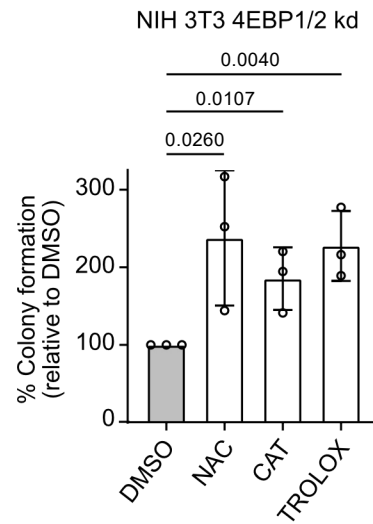**D**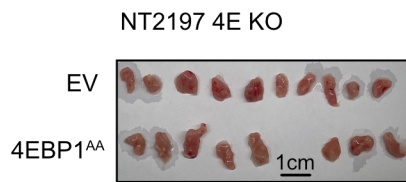**E**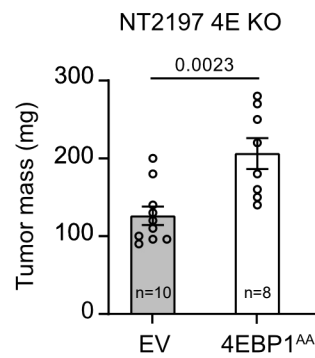**F**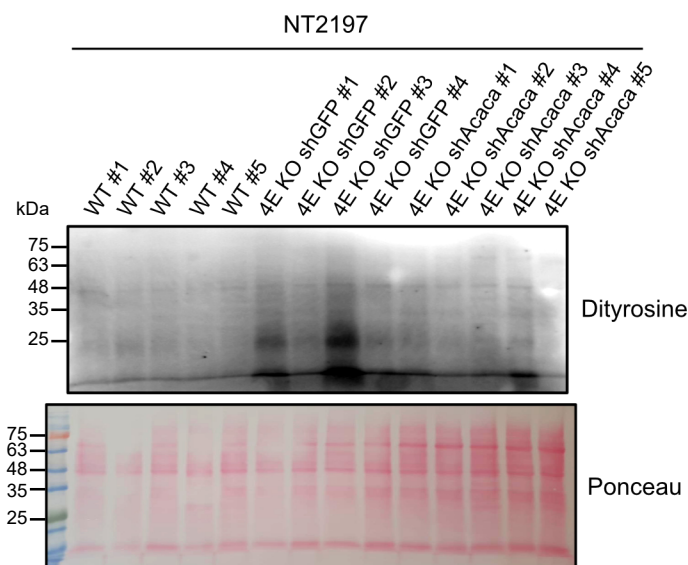**G**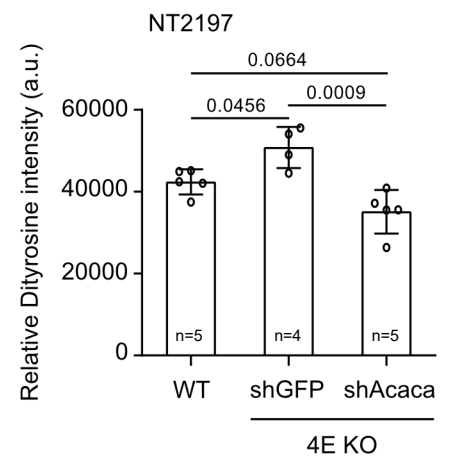



**Supplementary Figure 6. 4EBP1/2 support oncogenic transformation by controlling the redox balance and ACC1**

(A) NIH 3T3 transfected with control (scr), or *Eif4ebp1* and *Eif4ebp2* targeting siRNAs (*Eif4ebp1/2*) were grown in soft agar for 21 days. Colonies and single cells were counted, and colony formation efficiency was calculated. The level of the indicated proteins was analyzed by immunoblotting. (B) 4EBP1/2 WT NT2197 cells were grown in soft agar for 21 days and treated with DMSO, NAC, CAT, TROLOX or TOFA. Colonies and single cells were counted, and colony formation efficiency was calculated. (C) NIH 3T3 transfected with *Eif4ebp1* and *Eif4ebp2* targeting siRNAs (4EBP1/2 kd) were grown in soft agar for 21 days and treated with DMSO, NAC, CAT or TROLOX. Colonies and single cells were counted, and colony formation efficiency was calculated. (D, E) 4E KO NT2197 cells expressing empty vector (EV) or 4EBP1<sup>AA</sup> were injected in the mammary fat pad of NOD *SCID* gamma mice. Tumors were harvested, photographed (D) and weighed (E). n=10 mice for EV NT2197 cells and 8 mice for 4EBP1<sup>AA</sup> NT2197 cells. (F, G) WT NT2197, shGFP and shAcaca 4E KO NT2197 tumors were lysed and dityrosine levels were determined by immunoblot (F) and quantified (G). n=5 tissues for shAcaca and WT tumors and n=4 tissues for shGFP tumors. Representative immunoblots of two independent experiments are shown (F). Data are shown as the mean  $\pm$  SD. Statistics: unpaired one-sided Student's *t* test (A, B, C, E), one way ANOVA (G); n=3 independent experiments for A, B, C. Source data are provided as a Source Data file.

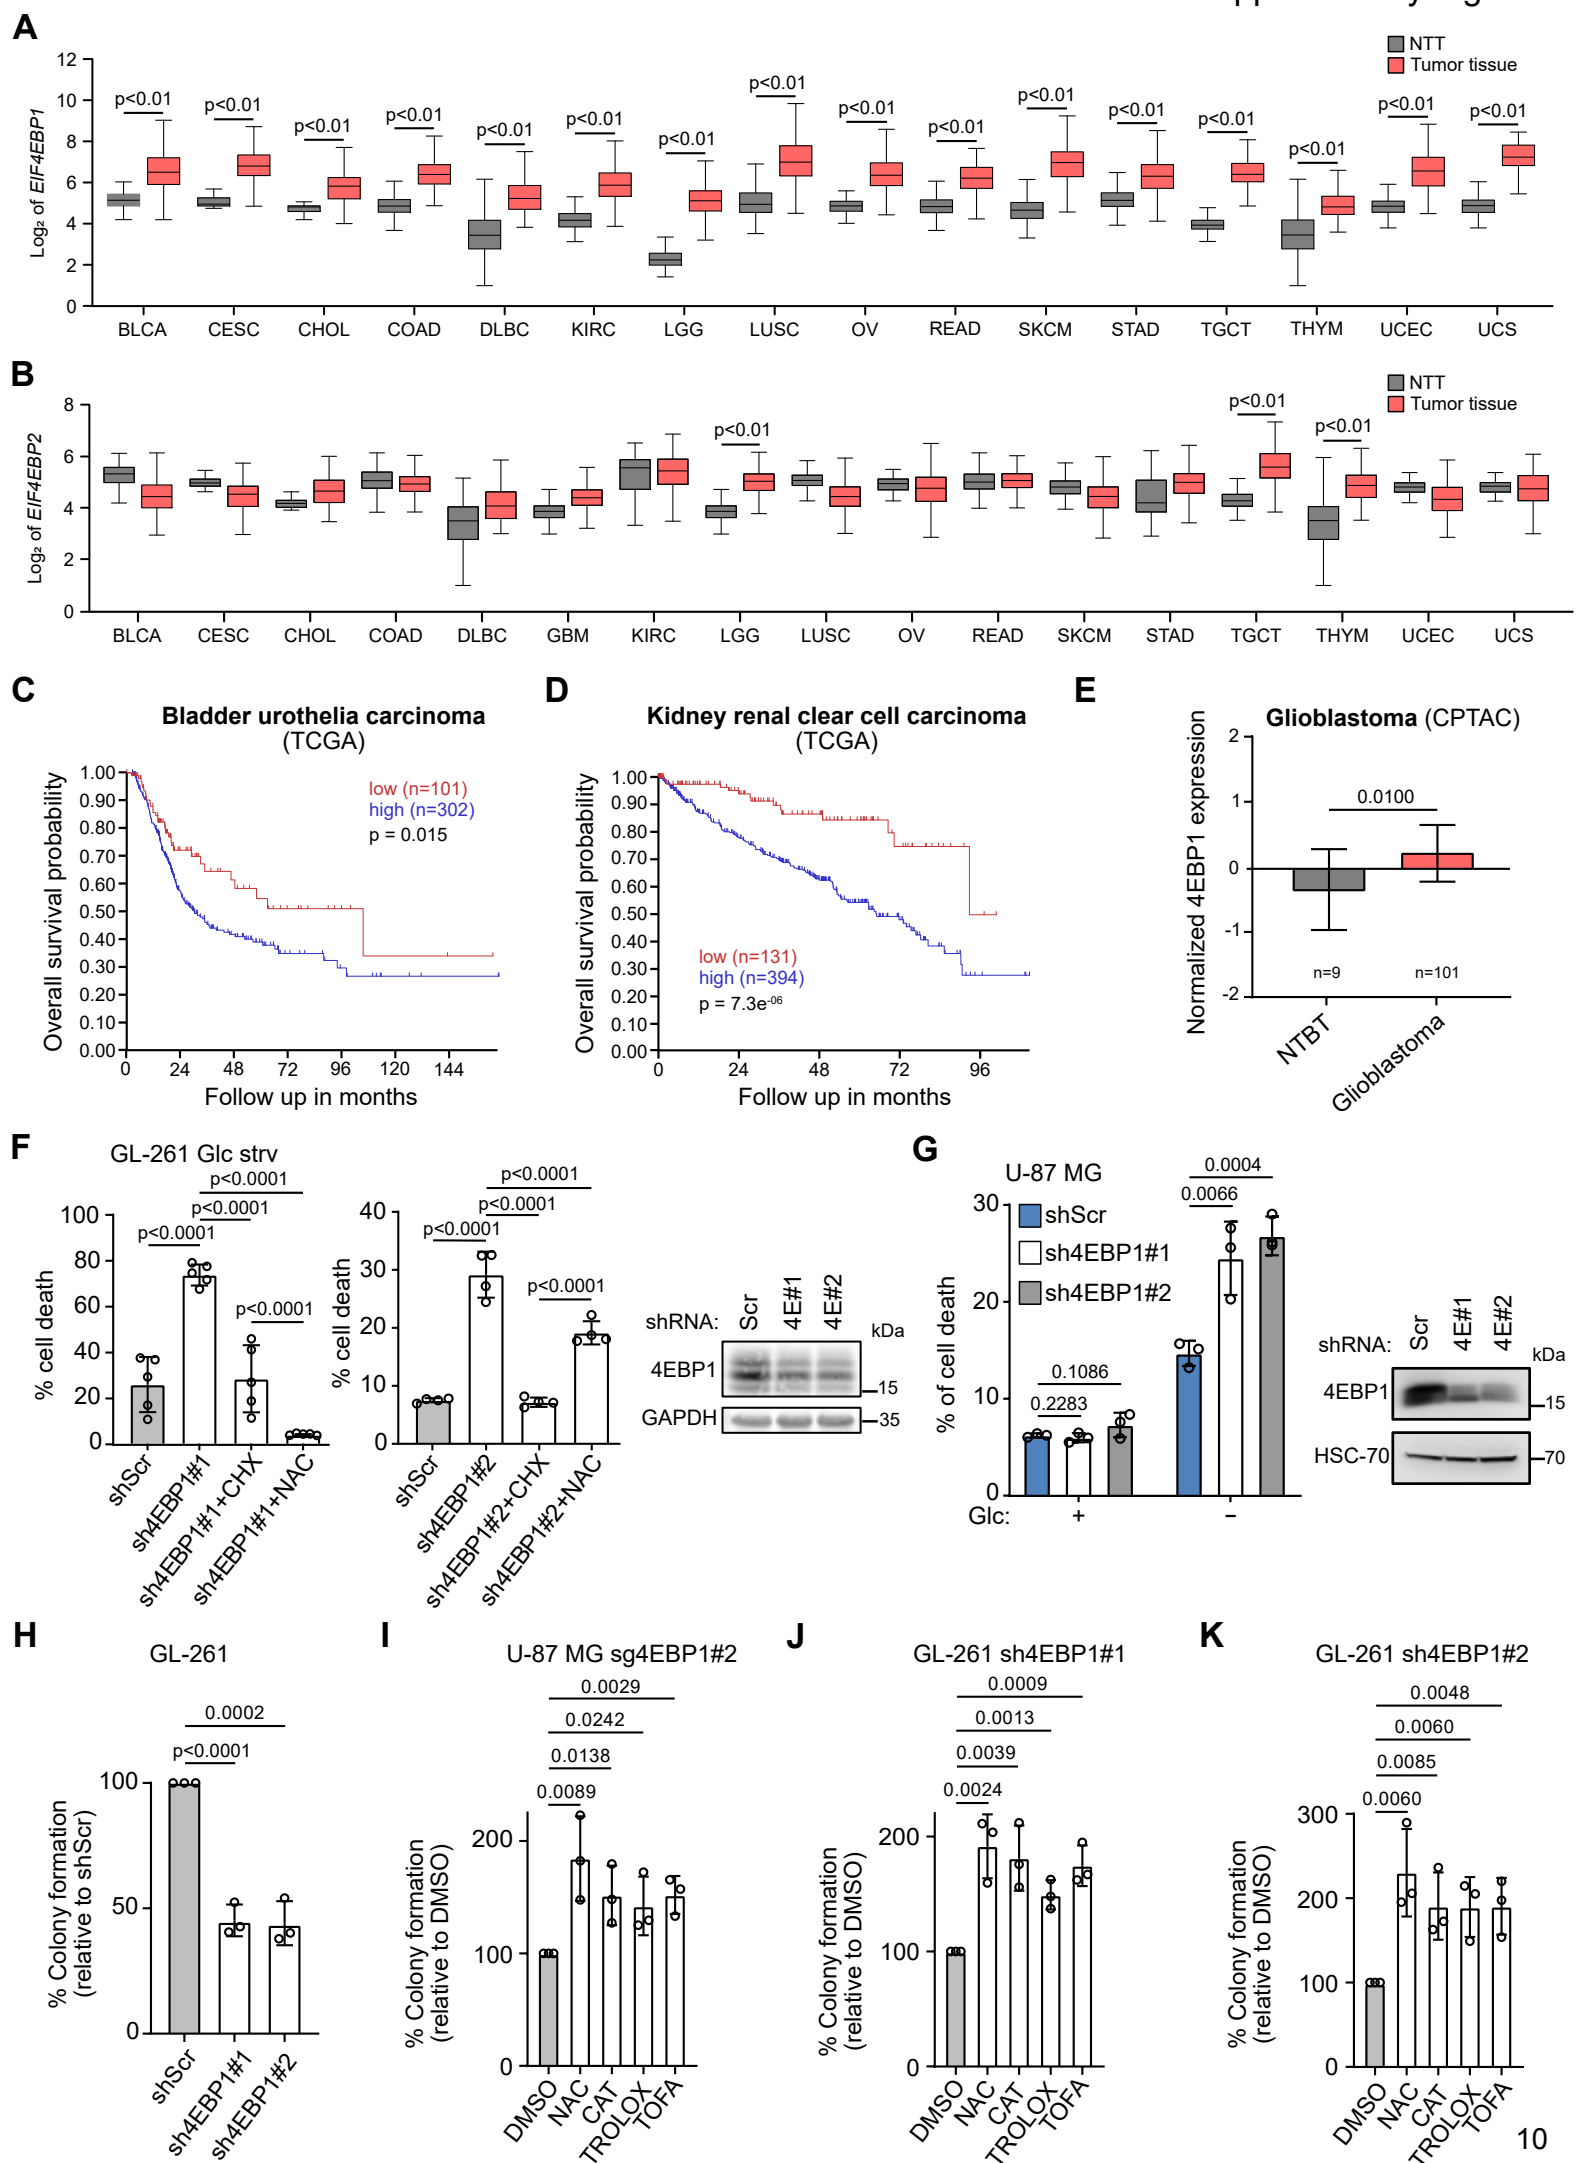

**Supplementary Figure 7. Clinical relevance of *EIF4EBP1* expression in cancer patients and contribution of 4EBP1 to survival of glioma cells under glucose deprivation**

(A, B) Expression levels of *EIF4EBP1* (A) and *EIF4EBP2* (B) in the indicated tumor entities and corresponding non-tumorigenic tissues (NTT) from TCGA. p values were calculated using an unpaired and two-tailed parametric *t* test. (C, D) Kaplan-Meier survival estimates of overall survival of bladder urothelial carcinoma (C) and kidney renal clear cell carcinoma (D) patients stratified by their *EIF4EBP1* mRNA levels (cut off first quartile) in the indicated cohorts. p values were calculated using a log rank test. (E) Expression levels of 4EBP1 protein in non-tumorigenic brain tissue (NTBT) and glioblastoma tissues from CPTAC GBM proteomic data. Data are shown as boxplots with medians, interquartile ranges and lower/upper whiskers in. p value was calculated using a two-tailed Mann-Whitney test. (F) The indicated cells were glucose starved (Glc strv) with or without cycloheximide (CHX) or NAC for 48 hrs. Cell death was measured by PI staining and flow cytometry. The levels of the indicated proteins were analyzed by immunoblotting. (G) The indicated cells were grown in complete medium or glucose (Glc) starved for 48 hrs. Cell death and protein levels were analyzed as in (F). (H) The indicated cells were grown in soft agar for 21 days. Colonies and single cells were counted, and colony formation efficiency was calculated and normalized to shScr. (I, J, K) The indicated cells were grown in soft agar for 21 days and treated with DMSO, NAC, CAT, TROLOX or TOFA. Colonies and single cells were counted, and colony formation efficiency was calculated and normalized to DMSO. Data are the mean  $\pm$  SD for F, G, H, I, J, K. Statistics: one way ANOVA (F), two way ANOVA (G), unpaired one-sided Student's *t* test (H, I, J, K); n=3-4 independent experiments for F, n=3 independent experiments for G, H, I, J, K. Source data are provided as a Source Data file.

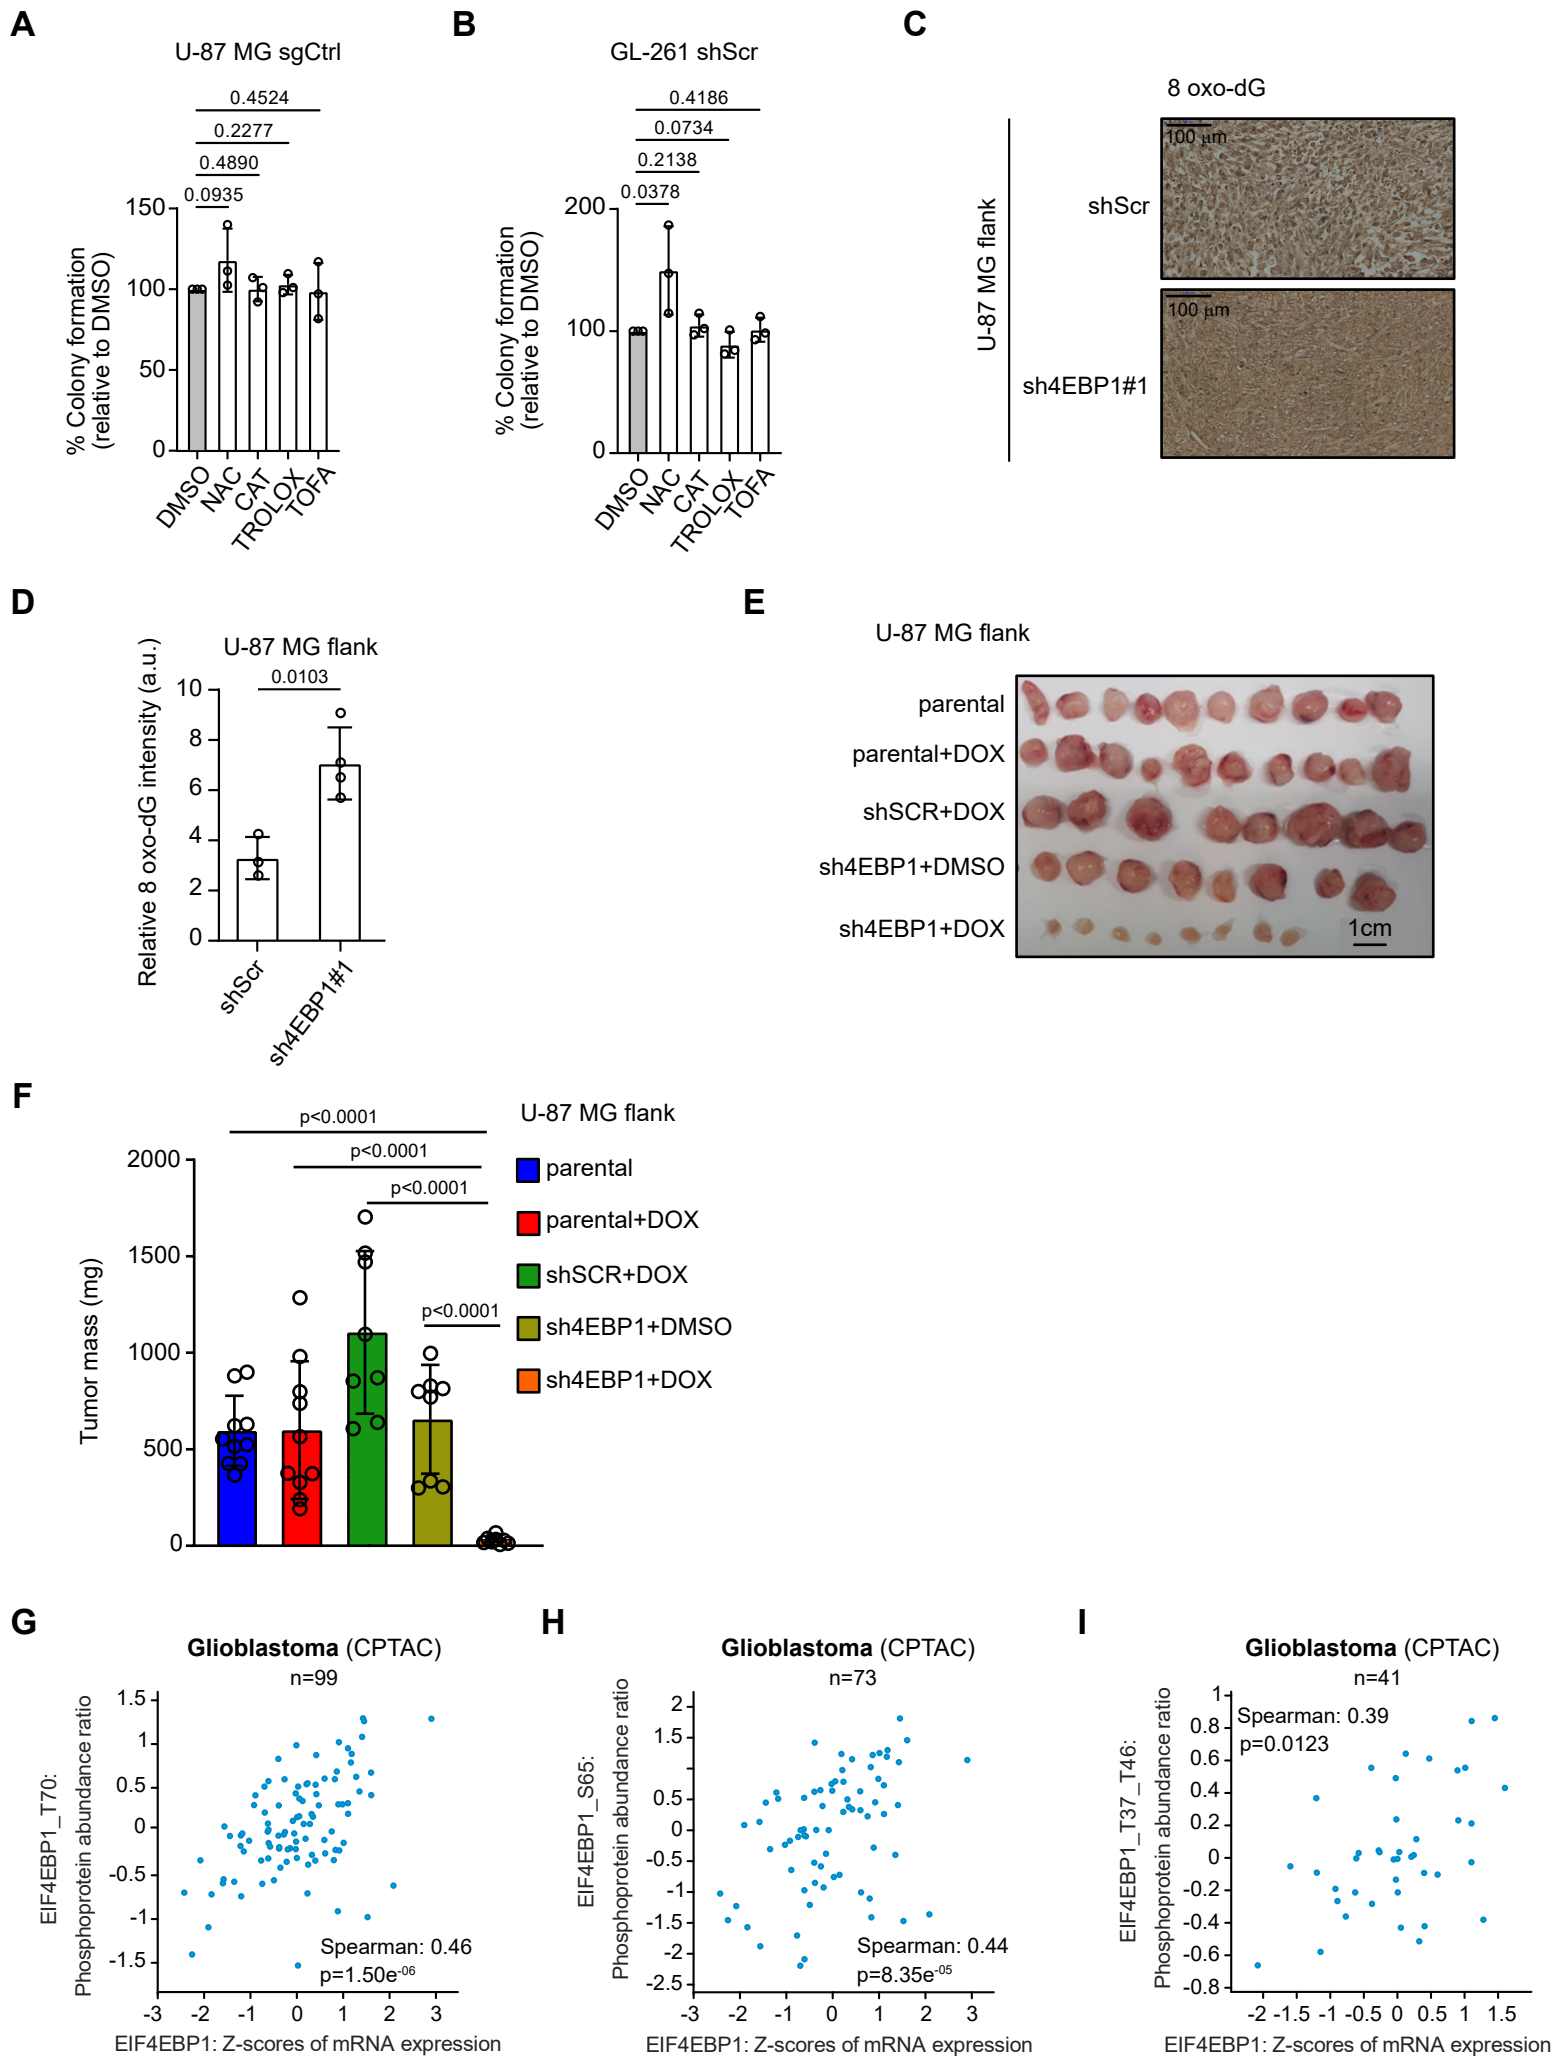

**Supplementary Figure 8. 4EBP1 restricts DNA oxidation in glioma tumors and *EIF4EBP1* expression correlates with levels of phospho-4EBP1 in glioblastoma**

(A, B) The indicated cells were grown in soft agar for 21 days and treated with DMSO, NAC, CAT, TROLOX or TOFA. Colonies and single cells were counted, and colony formation efficiency was calculated and normalized to DMSO. n=3 independent experiments. (C, D) Levels of 8-Oxo-2'-deoxyguanosine (8-oxo-dG) were determined in shScr and sh4EBP1#1 U-87 MG tumors by IHC (C) and quantified (D). n=3 tissues for shScr tumors and 4 tissues for sh4EBP1 tumors. (E, F) Inducible shRNA U87 cells were injected to the flanks of NOD *SCID* mice. When tumors reached 100 mm<sup>3</sup>, doxycycline was added to the drinking water. When the control tumors reached 1,400 mm<sup>3</sup>. All tumors were harvested and weighed (J). n=10 mice for the parental cell lines and n=8 mice for the shSCR and sh4EBP1 cell lines. (G-I) Expression levels of *EIF4EBP1* mRNA in glioblastoma patient samples plotted against the expression levels of phospho-4EBP1<sup>T70</sup> (G), phospho-4EBP1<sup>S65</sup> (H) or phospho-4EBP1<sup>T37,T46</sup> (I) using CPTAC GBM data. Co-expression levels were quantified by calculating the Spearman's rank correlation coefficient. Data are shown as the mean ± SD for A, B, D, F. Statistics: unpaired one-sided Student's *t* test (A, B, D), one way ANOVA (F).

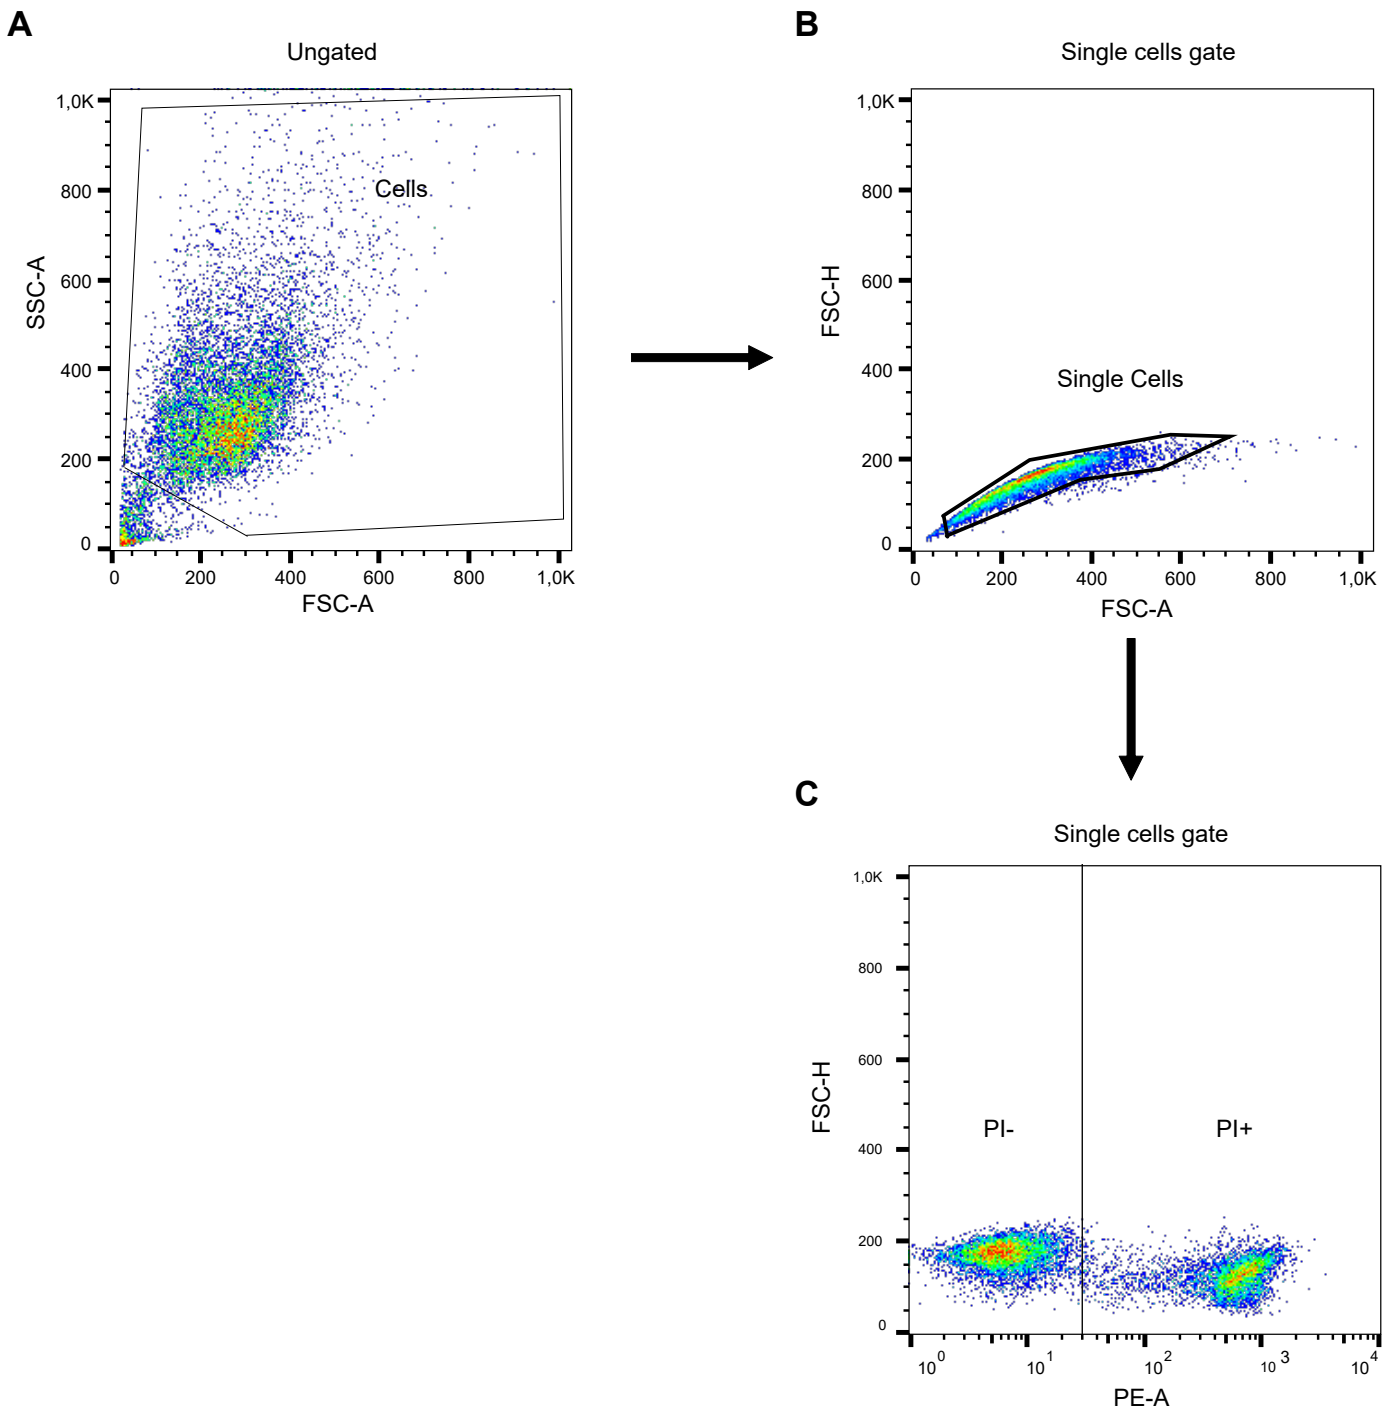

### Supplementary Figure 9. Flow cytometry gating strategy

Gating hierarchy of a representative sample stained with PI. (A) Cells were gated in FSC-A versus SSC-A to remove cell debris. (B) Single cells were gated in FSC-A versus FSC-H. (C) Two distinct groups (PI- and PI+ cells) were identified in PE-A versus FSC-H.

**Supplementary table 1:** List of siRNA sequences

| siRNA label and target gene            | siRNA sequence                      |
|----------------------------------------|-------------------------------------|
| Dharmacon – Horizon Discovery          |                                     |
| siGENOME Non-targeting Pool#1          | 5'- UGGUUUACAUGUCGACUAA -3'         |
|                                        | 5'- UAAGGCUAUGAAGAGAUAC -3'         |
|                                        | 5'- AUGUAAUUGGCCUGUAUUAG -3'        |
|                                        | 5'- AUGAACGUGAAUUGCUCAA -3'         |
| siGENOME mouse Eif4ebp1 Smart Pool     | 5'- GAACCAGGAUUAUCUAUGA -3'         |
|                                        | 5'- CAAAGGACCUGCCAGCCAU -3'         |
|                                        | 5'- GCGAUGAGCCUCCCAUGCA -3'         |
|                                        | 5'- CCAGCAGCCCAGGAAGAUAA -3'        |
| siGENOME mouse Eif4ebp2 Smart Pool     | 5'- GGGAGGAACACGAAUCAUU -3'         |
|                                        | 5'- UGAACAAUCAUGACAGGAA -3'         |
|                                        | 5'- GCACCGUGGCUAUCAGCGA -3'         |
|                                        | 5'- GUUGGACCGUCGCAAUUCU -3'         |
| siGENOME human and mouse EIF4E siRNA#1 | 5'- CAUAUCCAGUUGUCUAGUA -3'         |
| siGENOME human and mouse EIF4E siRNA#2 | 5'- GUGAUAAGAUAGCAAUAUG -3'         |
| siGENOME human ACACA siRNA#1           | 5'- CAGCAAACCUGGAUUCUGA -3'         |
| siGENOME human ACACA siRNA#2           | 5'- GCAAUUAGAUUCGUUGUCA -3'         |
| siGENOME mouse Acaca siRNA#1           | 5'- AGAUAGAAUCAUCGAGUUU -3'         |
| siGENOME mouse Acaca siRNA#2           | 5'- GGAUCAAGGAUUAUUCGUAU -3'        |
| ON-TARGETplus human FASN siRNA#1       | 5'- GAAGCACAUUGGCAAAGUC -3'         |
| ON-TARGETplus human FASN siRNA#2       | 5'- CUUCCGAGAUUCCAUCCUA -3'         |
| Sigma Aldrich                          |                                     |
| mouse Fasn siRNA#1, sense              | 5'- GUCAGAUCCUGGAACGAGA[dT][dT] -3' |
| mouse Fasn siRNA#1, antisense          | 5'- UCUCGUUCCAGGAUCUGAC[dT][dT] -3' |
| mouse Fasn siRNA#2, sense              | 5'- GUAAUGCUGGCCAAACUAA[dT][dT] -3' |
| mouse Fasn siRNA#2, antisense          | 5'- UUAGUUUGGCCAGCAUUAC[dT][dT] -3' |

**Supplementary table 2:** List of CRISPRi sgRNA sequences

| sgRNA label and target gene    | sgRNA sequence                   |
|--------------------------------|----------------------------------|
| sgRNA control, non-targeting   | 5'- GACCGCGCCAAACGTGCCCTGACGG-3' |
| sgRNA human <i>EIF4EBP1</i> #1 | 5'- GGACATGGTCTCCTGTGCGCG -3'    |
| sgRNA human <i>EIF4EBP1</i> #2 | 5'- GTGCGCTGCACCCGCGAACCG -3'    |
| sgRNA mouse <i>ACACA</i>       | 5'- GCCCAGCACATCTCGGCGCAG -3'    |

**Supplementary table 3:** List of RT-qPCR primers

| Primers target gene | sequence                                                                 |
|---------------------|--------------------------------------------------------------------------|
| <i>ACACA</i>        | FW: 5'- GCTGGTCCACATGAACAGG -3'<br>RV: 5'- GCCTTCTGGATATTCAGGACTTT -3'   |
| <i>EAP1</i>         | FW: 5'- CAGCCGCTACTCACAATC -3'<br>RV: 5'- GCTTTCTTTATTGTTACCGCTC -3'     |
| <i>ACT1</i>         | FW: 5'- CCAGAAGCTTTGTTCCATCC -3'<br>RV: 5'- CGGACATAACGATGTTACCG -3'     |
| <i>EIF4EBP1</i>     | FW: 5'- AGCCCTTCCAGTGATGAGC -3'<br>RV: 5'- TGCCATCTCAAAGTGTGACTCTT -3'   |
| <i>Eif4ebp1</i>     | FW: 5'- CTAGCCCTACCAGCGATGAG -3'<br>RV: 5'- CCTGGTATGAGGCCTGAATG -3'     |
| GusB                | FW: 5'- GTTTTTGGTCCAGACCCAGATG -3'<br>RV: 5'- GCCCATTATTCAGAGCGAGTA -3'  |
| PPIA                | FW: 5'- TTATTTGGGTTGCTCCCTTC -3'<br>RV: 5'- AAGTGTGCCAAATCTGCAAG -3'     |
| $\beta$ -actin      | FW: 5'- TCCCCAACTTGAGATGTATG -3'<br>RV: 5'- ACTGGTCTCAAGTCAGTGTACAGG -3' |
| L32                 | FW: 5'- GCACACTGACTACAGCCTTGA -3'<br>RV: 5'- TACCCAGGTTTGGAGGTGTG -3'    |

**Supplementary table 4:** List of shRNA sequences

| <b>shRNA label and target gene</b>               | <b>shRNA sequence</b>                                                   |
|--------------------------------------------------|-------------------------------------------------------------------------|
| scramble shRNA, for Tet-pLKO-puro                | 5'- CCGGTCCTAAGGTTAAGTCGCCCTCGCTCG<br>AGCGAGGGCGACTTAACCTTAGGTTTTTG -3' |
| human <i>EIF4EBP1</i> shRNA#1, for Tet-pLKO-puro | 5'- CCGGGCCAGGCCTTATGAAAGTGATCTCGA<br>GATCACTTTCATAAGGCCTGGCTTTTTG -3'  |
| human <i>EIF4EBP1</i> shRNA#2, for Tet-pLKO-puro | 5'- CCGGCGGTGAAGAGTCACAGTTTGACTCGA<br>GTCAAAGTGTGACTCTTCACCGTTTTG -3'   |
| mouse <i>ACACA</i> shRNA, for pLKO.1-neo         | 5'- CCGGAGATAGAATCATCGAGTTTCTCGAGA<br>AACTCGATGATTCTATCTTTTTG -3'       |



### Mice used in experiments

| Figure    | Species | Strain                         | Sex | Number | Age | Ethical approval |
|-----------|---------|--------------------------------|-----|--------|-----|------------------|
| 5E&F      | mice    | NOD <i>SCID</i> gamma          | F   | 22     | 8W  | IL59082019E      |
| 5G&H      | mice    | NOD <i>SCID</i> gamma          | M   | 22     | 7W  | IL59082019E      |
| 5I&J      | mice    | NOD <i>SCID</i> gamma          | F   | 18     | 8W  | IL59082019E      |
| S6D&E     | mice    | NOD <i>SCID</i> gamma          | F   | 18     | 7W  | IL59082019E      |
| 6F        | mice    | NOD <i>SCID</i> (Jackson Labs) | M   | 35     | 8W  | IL80122015E      |
| 6G, S8I&J | mice    | NOD <i>SCID</i> gamma          | F   | 44     | 7W  | IL59082019E      |
| 6H        | mice    | NOD <i>SCID</i> gamma          | M   | 15     | 6W  | IL34062016E      |
| 6I        | mice    | C57BL/6J (Envigo)              | F   | 17     | 8W  | IL59082019E      |
| 6J        | mice    | C57BL/6J (Envigo)              | F   | 17     | 8W  | IL59082019E      |

NOD *SCID* gamma mice (NOD.Cg-Prkdcscid Il2rgtm1Wjl/SzJ), Jackson Labs, Bar Harbor ME, USA.

### Key resources table

| REAGENT or RESOURCE                              | SOURCE                    | IDENTIFIER                                  |
|--------------------------------------------------|---------------------------|---------------------------------------------|
| Antibodies / dilution                            |                           |                                             |
| 4E-BP1 / 1:1000                                  | Cell Signaling Technology | Cat#9644; RRID: <a href="#">AB_2097841</a>  |
| 4E-BP2 / 1:1000                                  | Cell Signaling Technology | Cat#2845; RRID: <a href="#">AB_10699019</a> |
| ACC1 (Acetyl-CoA Carboxylase 1) / 1:500          | Cell Signaling Technology | Cat#4190; RRID: <a href="#">AB_796746</a>   |
| ACC2 / 1:1000                                    | Cell Signaling Technology | Cat#8578; RRID: <a href="#">AB_10949898</a> |
| Anti-mouse IgG / 1:10000                         | Cell Signaling Technology | Cat#7076; RRID: <a href="#">AB_330924</a>   |
| Anti-rabbit IgG / 1:10000                        | Cell Signaling Technology | Cat#7074; RRID: <a href="#">AB_2099233</a>  |
| Anti- $\beta$ -Actin / 1:1000                    | Sigma Aldrich             | Cat#A2228; RRID: <a href="#">AB_476697</a>  |
| GAPDH / 1:2000                                   | Cell Signaling Technology | Cat#2118; RRID: <a href="#">AB_561053</a>   |
| LC3B / 1:1000                                    | Cell Signaling Technology | Cat#2775; RRID: <a href="#">AB_915950</a>   |
| Phospho-Acetyl-CoA Carboxylase (S79) / 1:500     | Cell Signaling Technology | Cat#3661; RRID: <a href="#">AB_330337</a>   |
| Phospho-AMPKalpha (T172) / 1:500                 | Cell Signaling Technology | Cat#2535; RRID: <a href="#">AB_331250</a>   |
| Phospho-S6 Ribosomal Protein (S240/244) / 1:1000 | Cell Signaling Technology | CAT#2215; RRID: <a href="#">AB_331682</a>   |
| Vinculin / 1:1000                                | Cell Signaling Technology | Cat#4650; RRID: <a href="#">AB_10559207</a> |

|                                                                 |                           |                                                 |
|-----------------------------------------------------------------|---------------------------|-------------------------------------------------|
| Phospho-ULK1 (S555) / 1:1000                                    | Cell Signaling Technology | Cat#5869; RRID: <a href="#">AB_10707365</a>     |
| eIF4E / 1:1000                                                  | Cell Signaling Technology | Cat#9742; RRID: <a href="#">AB_823488</a>       |
| FASN (Fatty acid synthase) / 1:1000                             | Cell Signaling Technology | Cat#3180; RRID: <a href="#">AB_2100796</a>      |
| ACLY / 1:1000                                                   | Cell Signaling Technology | Cat#13390; RRID: <a href="#">AB_2798203</a>     |
| AMPKalpha / 1:1000                                              | Cell Signaling Technology | Cat#2532; RRID: <a href="#">AB_330331</a>       |
| Dityrosine / 1:1000                                             | AdipoGene                 | Cat#JAI-MDT-020P                                |
| 8-hydroxy-2'-deoxyguanosine / 1:250                             | R&D Systems               | Cat#4345-MC-050                                 |
| Mouse specific HRP/DAB / 1:200                                  | Abcam                     | Cat#ab64259                                     |
| IRDye® 800CW Goat anti-Mouse IgG Secondary Antibody / 1:10000   | LI-COR Bioscience         | Cat#925-32210; RRID: <a href="#">AB_2687825</a> |
| IRDye® 800CW Goat anti-Rabbit IgG Secondary Antibody / 1:10000  | LI-COR Bioscience         | Cat#925-32211; RRID: <a href="#">AB_2651127</a> |
| ULK1 / 1:1000                                                   | Cell Signaling Technology | Cat#8054; RRID: <a href="#">AB_11178668</a>     |
| HSC-70 / 1:5000                                                 | Santa Cruz                | Cat#sc-7298; RRID: <a href="#">AB_627761</a>    |
| Mouse anti-HA-tag (F-7) / 1:1000                                | Santa Cruz                | Cat#sc-7392; RRID: <a href="#">AB_2894930</a>   |
| Streptavidin-HRP / 1:10000                                      | ABCAM                     | Cat#ab59653                                     |
| <b>Bacterial and Virus Strains</b>                              |                           |                                                 |
| Competent <i>E.coli</i> Stbl3                                   | This study                | N/A                                             |
| <b>Chemicals, Peptides, and Recombinant Proteins</b>            |                           |                                                 |
| N-acetyl-cysteine (NAC)                                         | Sigma-Aldrich             | Cat#A7250                                       |
| Catalase-polyethylene glycol (CAT)                              | Sigma-Aldrich             | Cat#C4963                                       |
| 6-hydroxy-2,5,7,8-tetramethylchroman-2-carboxylic acid (Trolox) | Sigma-Aldrich             | Cat#238813                                      |
| 5-(Tetradecyloxy)-2-furoic acid (TOFA)                          | Sigma-Aldrich             | Cat#T6575                                       |
| Dimethyl sulfoxide (DMSO)                                       | Sigma-Aldrich             | Cat#D8418                                       |
| Cycloheximide (CHX)                                             | Sigma-Aldrich             | Cat#01810                                       |
| Gemcitabine hydrochloride                                       | Sigma-Aldrich             | Cat#G6423                                       |
| Crystal violet                                                  | Sigma-Aldrich             | Cat#C0775                                       |
| Rapamycin                                                       | Selleckchem               | Cat#S1039                                       |
| Ku-0063794                                                      | Selleckchem               | Cat#S1226                                       |
| 4EGI-1                                                          | Selleckchem               | Cat#S7369                                       |
| Proteinase K                                                    | Sigma-Aldrich             | Cat#3115887001                                  |
| Doxycycline hydrochloride (DOX)                                 | Santa Cruz                | Cat#sc-337691                                   |
| <b>Critical Commercial Assays</b>                               |                           |                                                 |
| Pierce™ BCA Protein Assay Kit                                   | ThermoFisher Scientific   | Cat#23225                                       |
| NADP/NADPH-Glo™                                                 | Promega                   | Cat#G9081                                       |
| NAD/NADH-Glo™                                                   | Promega                   | Cat#G9071                                       |
| GSH/GSSG-Glo™                                                   | Promega                   | Cat#V6611                                       |

|                                                                                                                           |                                                       |                                                                                                                           |
|---------------------------------------------------------------------------------------------------------------------------|-------------------------------------------------------|---------------------------------------------------------------------------------------------------------------------------|
| Click-iT™ Protein Reaction Buffer Kit                                                                                     | ThermoFisher Scientific                               | Cat#C10276                                                                                                                |
| Click-iT™ EdU Cell Proliferation Kit for Imaging, Alexa Fluor™ 488                                                        | ThermoFisher Scientific                               | Cat#C10337                                                                                                                |
| Dual-Luciferase Reporter Assay System                                                                                     | Promega                                               | Cat#E1980                                                                                                                 |
| TMRE Mitochondrial Membrane Potential Assay Kit                                                                           | Cayman Chemical                                       | Cat#701310                                                                                                                |
| <b>Deposited Data</b>                                                                                                     |                                                       |                                                                                                                           |
| CPTAC GBM proteomic data                                                                                                  | 1                                                     | <a href="https://cptac-data-portal.georgetown.edu/cptac/s/S048">https://cptac-data-portal.georgetown.edu/cptac/s/S048</a> |
| TCGA GBM proteomic data                                                                                                   | 2                                                     |                                                                                                                           |
| <b>From R<sup>2</sup>AMC:</b>                                                                                             |                                                       | <a href="http://r2.amc.nl">http://r2.amc.nl</a>                                                                           |
| FRENCH cohort                                                                                                             | 3                                                     | GEO ID: gse106011                                                                                                         |
| TCGA bladder carcinoma                                                                                                    |                                                       | ID: BLCA                                                                                                                  |
| TCGA Kidney renal clear cell carcinoma                                                                                    |                                                       | ID: KIRC                                                                                                                  |
| <b>From the GEPIA website:</b>                                                                                            |                                                       | <a href="http://gepia.cancer-pku.cn">http://gepia.cancer-pku.cn</a>                                                       |
| GTEX across datasets                                                                                                      | 4                                                     |                                                                                                                           |
| TCGA across datasets                                                                                                      | 4                                                     |                                                                                                                           |
| <b>From the Chinese Glioma Genome Atlas website:</b>                                                                      |                                                       | <a href="http://www.cgga.org.cn">www.cgga.org.cn</a>                                                                      |
| CGGA cohort                                                                                                               | 5                                                     |                                                                                                                           |
| <b>Experimental Models: Cell Lines</b>                                                                                    |                                                       |                                                                                                                           |
| Human: HEK293 (human embryonic kidney)                                                                                    | American Type Culture Collection (ATCC)               | Cat#CRL-1573                                                                                                              |
| Human: HEK293-T (SV40 T-antigen containing human embryonic kidney cells)                                                  | ATCC                                                  | Cat#CRL-3216                                                                                                              |
| Human: U-87 MG (glioblastoma)                                                                                             | ATCC                                                  | Cat#HTB-14                                                                                                                |
| Human: HeLa (cervical adenocarcinoma)                                                                                     | ATCC                                                  | Cat#CRM-CCL-2                                                                                                             |
| Human: MCF7 (breast cancer)                                                                                               | ATCC                                                  | Cat#HTB-22                                                                                                                |
| Human: IMR-32 (neuroblastoma)                                                                                             | Alexander Schramm (University Hospital Essen)         | N/A                                                                                                                       |
| Human: Kelly (neuroblastoma)                                                                                              | Alexander Schramm (University Hospital Essen)         | N/A                                                                                                                       |
| Human: Med8a (medulloblastoma)                                                                                            | Pablo Landgraf (University Hospital Cologne, Cologne) | N/A                                                                                                                       |
| Human: HD-MB03 (medulloblastoma)                                                                                          | Till Milde (DKFZ, Heidelberg)                         | N/A                                                                                                                       |
| Human: iPSC                                                                                                               | TakaraBio                                             | Cat#Y00270                                                                                                                |
| Human: HEK293 shRNA control (shScr)                                                                                       | 6                                                     | N/A                                                                                                                       |
| Human: HEK293 shRNAs 4EBP1, 4EBP2 (sh4EBP1/2)                                                                             | 6                                                     | N/A                                                                                                                       |
| Mouse: MEF WT (p53 <sup>-/-</sup> ) and (mouse embryonic fibroblast, <i>Tp53</i> null)                                    | 6                                                     | N/A                                                                                                                       |
| Mouse: MEF 4EBP1/4EBP2 double knockout (DKO) (p53 <sup>-/-</sup> ) ( <i>Eif4ebp1</i> , <i>Eif4ep2</i> , <i>Tp53</i> null) | 6                                                     | N/A                                                                                                                       |
| Mouse: MEF AMPK $\alpha$ knockout ( <i>AMPK<math>\alpha</math>1</i> , <i>AMPK<math>\alpha</math>2</i> null)               | 7                                                     | N/A                                                                                                                       |
| Mouse: NMuMG-NT2197 control                                                                                               | 8                                                     | N/A                                                                                                                       |

|                                                                                                                                                                                  |                                                          |                        |
|----------------------------------------------------------------------------------------------------------------------------------------------------------------------------------|----------------------------------------------------------|------------------------|
| Mouse: NMuMG-NT2197 4EBP1/4EBP2 double knockout (DKO)                                                                                                                            | 8                                                        | N/A                    |
| Mouse: GL-261                                                                                                                                                                    | Reuven Stein (Tel Aviv University; Israel)               | N/A                    |
| Mouse: NIH 3T3 K-Ras <sup>V12</sup>                                                                                                                                              | 9                                                        | N/A                    |
| Experimental Models: Organisms/Strains                                                                                                                                           |                                                          |                        |
| <i>S. cerevisiae</i> : BY4742 WT MAT $\alpha$ his3 $\Delta$ 1 leu2 $\Delta$ 0 lys2 $\Delta$ 0 ura3 $\Delta$ 0                                                                    | Andreas Reichert (Heinrich Heine University, Düsseldorf) | N/A                    |
| <i>S. cerevisiae</i> : Eap1 $\Delta$ MAT $\alpha$ his3 $\Delta$ 1 leu2 $\Delta$ 0 lys2 $\Delta$ 0 ura3 $\Delta$ 0 eap1 $\Delta$ ::NatMX4                                         | This study                                               | N/A                    |
| <i>S. cerevisiae</i> : Caf20 $\Delta$ MAT $\alpha$ his3 $\Delta$ 1 leu2 $\Delta$ 0 lys2 $\Delta$ 0 ura3 $\Delta$ 0 caf20 $\Delta$ ::KanMX4                                       | This study                                               | N/A                    |
| <i>S. cerevisiae</i> : Eap1 $\Delta$ /Caf20 $\Delta$ MAT $\alpha$ his3 $\Delta$ 1 leu2 $\Delta$ 0 lys2 $\Delta$ 0 ura3 $\Delta$ 0 eap1 $\Delta$ ::NatMX4 caf20 $\Delta$ ::KanMX4 | This study                                               | N/A                    |
| Mouse: NOD SCID Gamma <i>Prkdc</i> <sup>scid</sup>                                                                                                                               | The Jackson Laboratory                                   | RRID:IMSR_JAX:001303   |
| Mouse: C57BL/6J                                                                                                                                                                  | The Jackson Laboratory                                   | RRID:IMSR_JAX:000664   |
| Oligonucleotides                                                                                                                                                                 |                                                          |                        |
| siGENOME Non-Targeting (scramble) Pool#1                                                                                                                                         | Dharmacon – Horizon Discovery                            | Cat#D1206-13-05        |
| siGENOME mouse Eif4ebp1 siRNA Pool                                                                                                                                               | Dharmacon – Horizon Discovery                            | Cat#D-05861-01         |
| siGENOME mouse Eif4ebp2 siRNA Pool                                                                                                                                               | Dharmacon – Horizon Discovery                            | Cat#D-044972-01        |
| siGENOME human and mouse EIF4E siRNA#1                                                                                                                                           | Dharmacon – Horizon Discovery                            | Cat#D-003884-02        |
| siGENOME human and mouse EIF4E siRNA#2                                                                                                                                           | Dharmacon – Horizon Discovery                            | Cat#D-003884-03        |
| siGENOME human ACACA siRNA#1                                                                                                                                                     | Dharmacon – Horizon Discovery                            | Cat#D-004551-03        |
| siGENOME human ACACA siRNA#2                                                                                                                                                     | Dharmacon – Horizon Discovery                            | Cat# D-004551-05       |
| siGENOME mouse Acaca siRNA#1                                                                                                                                                     | Dharmacon – Horizon Discovery                            | Cat#D-063938-18        |
| siGENOME mouse Acaca siRNA#2                                                                                                                                                     | Dharmacon – Horizon Discovery                            | Cat#D-063938-20        |
| ON-TARGETplus human FASN siRNA#1                                                                                                                                                 | Dharmacon – Horizon Discovery                            | Cat# J-003954-12-0005  |
| ON-TARGETplus human FASN siRNA#2                                                                                                                                                 | Dharmacon – Horizon Discovery                            | Cat# J-003954-14-0005  |
| mouse Fasn siRNA#1                                                                                                                                                               | Sigma Aldrich                                            | Cat#SASI_Mm01_00177854 |
| mouse Fasn siRNA#2                                                                                                                                                               | Sigma Aldrich                                            | Cat#SASI_Mm01_00177855 |
| siRNA sequences, see Table S1                                                                                                                                                    |                                                          |                        |
| CRISPRi sgRNA Control                                                                                                                                                            | This study                                               | N/A                    |
| CRISPRi sgRNA targeting human <i>EIF4EBP1</i> #1                                                                                                                                 | This study                                               | N/A                    |
| CRISPRi sgRNA targeting human <i>EIF4EBP1</i> #2                                                                                                                                 | This study                                               | N/A                    |
| CRISPRi sgRNA targeting mouse <i>Acaca</i>                                                                                                                                       | This study                                               | N/A                    |
| SgRNA sequences, see Table S2                                                                                                                                                    |                                                          |                        |
| Primers for qRT-PCR, see Table S3                                                                                                                                                |                                                          |                        |

| Recombinant DNA                                                 |                         |                                                                       |
|-----------------------------------------------------------------|-------------------------|-----------------------------------------------------------------------|
| Scramble: pLKO.1-puro scramble shRNA                            | Addgene                 | Cat#1864                                                              |
| sh4EBP1#1: <i>EIF4EBP1</i> MISSION shRNA (human, pLKO.1-puro)   | Sigma Aldrich           | TRCN0000040203                                                        |
| sh4EBP1#2: <i>EIF4EBP1</i> MISSION shRNA (human, pLKO.1-puro)   | Sigma Aldrich           | TRCN0000298904                                                        |
| sh4EBP1#1: <i>Eif4ebp1</i> MISSION shRNA (mouse, pLKO.1-puro)   | Sigma Aldrich           | TRCN0000075610                                                        |
| sh4EBP1#2: <i>Eif4ebp1</i> MISSION shRNA (mouse, pLKO.1-puro)   | Sigma Aldrich           | TRCN0000348615                                                        |
| pLKO.1-neo                                                      | Addgene                 | Cat#13425                                                             |
| shGFP: GFP shRNA (pLKO.1-neo)                                   | Addgene                 | Cat#72571                                                             |
| shAcaca: <i>Acaca</i> shRNA (mouse, pLKO.1-neo)                 | This study              | N/A                                                                   |
| Tet-pLKO-puro                                                   | Addgene                 | Cat#21915                                                             |
| Scramble inducible: Tet-pLKO-puro Non-Mammalian shRNA Control   | This study              | N/A                                                                   |
| ish4EBP1#1: <i>EIF4EBP1</i> shRNA#1 (human, Tet-pLKO-puro)      | This study              | N/A                                                                   |
| ish4EBP1#2: <i>EIF4EBP1</i> shRNA#2 (human, Tet-pLKO-puro)      | This study              | N/A                                                                   |
| gRNA-dCas9-KRAB GFP                                             | Addgene                 | Cat#71237                                                             |
| sgCtrl: negative control sgRNA (gRNA-dCas9-KRAB GFP)            | This study              | N/A                                                                   |
| sgAcaca: <i>Acaca</i> sgRNA (mouse, gRNA-dCas9-KRAB GFP)        | This study              | N/A                                                                   |
| sg4EBP1#1: <i>EIF4EBP1</i> sgRNA#1 (human, gRNA-dCas9-KRAB GFP) | This study              | N/A                                                                   |
| sg4EBP1#2: <i>EIF4EBP1</i> sgRNA#2 (human, gRNA-dCas9-KRAB GFP) | This study              | N/A                                                                   |
| pLJM1                                                           | Addgene                 | Cat#91980                                                             |
| pLJM1-4EBP1 (T37A/T46A) [4EBP1 <sup>AA</sup> ]                  | This study              | N/A                                                                   |
| pLJM1-4EBP1AA (Y54A/L59A) [4EBP1 <sup>AA, YL</sup> ]            | This study              | N/A                                                                   |
| pMSCV puro                                                      | Clontech                | Cat#K1062-1                                                           |
| pMSCV puro-4EBP1 (T37A/T46A) [4EBP1 <sup>AA</sup> ]             | <sup>10</sup>           | N/A                                                                   |
| psPAX2                                                          | Addgene                 | Cat#12260                                                             |
| pMD2.G                                                          | Addgene                 | Cat#12259                                                             |
| pCDNA3.1                                                        | ThermoFisher Scientific | Cat# V79020                                                           |
| pCDNA3.1-ACC1-HA                                                | This study              | N/A                                                                   |
| pGL3 control                                                    | Promega                 | Cat#E1741                                                             |
| pGL3-ACACA 5'UTR (5'UTR of human ACACA isoform 3)               | This study              | N/A                                                                   |
| pUb-ACC1-HA                                                     | This study              | N/A                                                                   |
| pUb-UTR-ACC1-HA                                                 | This study              | N/A                                                                   |
| pRL null <i>Renilla</i> Luciferase plasmid                      | Promega                 | Cat#E2271                                                             |
| Software and Algorithms                                         |                         |                                                                       |
| R2 Genomic Analysis Visualization Platform                      |                         | <a href="http://r2.amc.nl">http://r2.amc.nl</a>                       |
| GEPIA website                                                   | <sup>4</sup>            | <a href="http://gepia.cancer-pku.cn">http://gepia.cancer-pku.cn</a>   |
| GraphPad Prism version 7.04 and 8.0.2                           | GraphPad Software       |                                                                       |
| cBioportal                                                      | <sup>11, 12</sup>       | <a href="https://www.cbioportal.org/">https://www.cbioportal.org/</a> |

| Other                                          |                         |                   |
|------------------------------------------------|-------------------------|-------------------|
| Calfectin™ Mammalian Cell Transfection Reagent | SignaGen                | Cat#SL100478      |
| siLentFect™ Lipid Reagent for RNAi             | BioRad                  | Cat#1703362       |
| CM-H2DCFDA                                     | ThermoFisher Scientific | Cat#C6827         |
| 5'-Ethylnyl-2'-deoxyuridine (EdU)              | ThermoFisher Scientific | Cat#A10044        |
| Azidohomoalanine (AHA)                         | ThermoFisher Scientific | Cat#C10102        |
| [1- <sup>14</sup> C]-acetate                   | Perkin Elmer            | Cat#NEC084A001M C |
| Palmitic Acid, [9,10- <sup>3</sup> H(N)]       | Perkin Elmer            | NET043001MC       |
| MitoTracker™ Green FM                          | ThermoFisher Scientific | Cat#M7514         |

## References

1. Wang, L.B. *et al.* Proteogenomic and metabolomic characterization of human glioblastoma. *Cancer Cell* **39**, 509-528 e520 (2021).
2. Brennan, C.W. *et al.* The somatic genomic landscape of glioblastoma. *Cell* **155**, 462-477 (2013).
3. Gravendeel, L.A. *et al.* Intrinsic gene expression profiles of gliomas are a better predictor of survival than histology. *Cancer Res* **69**, 9065-9072 (2009).
4. Tang, Z. *et al.* GEPIA: a web server for cancer and normal gene expression profiling and interactive analyses. *Nucleic Acids Res* **45**, W98-W102 (2017).
5. Zhao, Z. *et al.* Chinese Glioma Genome Atlas (CGGA): A Comprehensive Resource with Functional Genomic Data from Chinese Glioma Patients. *Genomics Proteomics Bioinformatics* **19**, 1-12 (2021).
6. Dowling, R.J.O. *et al.* mTORC1-mediated cell proliferation, but not cell growth, controlled by the 4E-BPs. *Science (New York, N.Y.)* **328**, 1172-1176 (2010).
7. Laderoute, K.R. *et al.* 5'-AMP-activated protein kinase (AMPK) is induced by low-oxygen and glucose deprivation conditions found in solid-tumor microenvironments. *Molecular and cellular biology* **26**, 5336-5347 (2006).
8. Hulea, L. *et al.* Translational and HIF-1alpha-Dependent Metabolic Reprogramming Underpin Metabolic Plasticity and Responses to Kinase Inhibitors and Biguanides. *Cell Metab* **28**, 817-832 e818 (2018).
9. Leprivier, G. *et al.* The eEF2 kinase confers resistance to nutrient deprivation by blocking translation elongation. *Cell* **153**, 1064-1079 (2013).

10. Goldsmith, A.M. *et al.* Transforming growth factor-beta induces airway smooth muscle hypertrophy. *Am J Respir Cell Mol Biol* **34**, 247-254 (2006).
11. Cerami, E. *et al.* The cBio cancer genomics portal: an open platform for exploring multidimensional cancer genomics data. *Cancer Discov* **2**, 401-404 (2012).
12. Gao, J. *et al.* Integrative analysis of complex cancer genomics and clinical profiles using the cBioPortal. *Sci Signal* **6**, p11 (2013).
